# Supplementary material for: Dopaminergic co-transmission with sonic hedgehog inhibits abnormal involuntary movements in models of Parkinson’s disease and L-Dopa induced dyskinesia
Source: PubMed Central journal article supplement (PMC8458306; doi:10.1038/s42003-021-02567-3), 2021-09-22
Supplement: 42003_2021_2567_MOESM2_ESM.pdf [file 42003_2021_2567_MOESM2_ESM.pdf]

**Supplementary Information for**

**“Dopaminergic Co-transmission with Sonic Hedgehog Inhibits Abnormal Involuntary Movements in Models of Parkinson’s Disease and L-Dopa Induced Dyskinesia”**

**Lauren Malave, Dustin R. Zuelke, Santiago Uribe-Cano, Lev Starikov, Heike Rebholz, Eitan Friedman, Chuan Qin, Qin Li, Erwan Bezard, and Andreas H. Kottmann.**

## Supplementary Figures:

### a TH fiber density in the Striatum

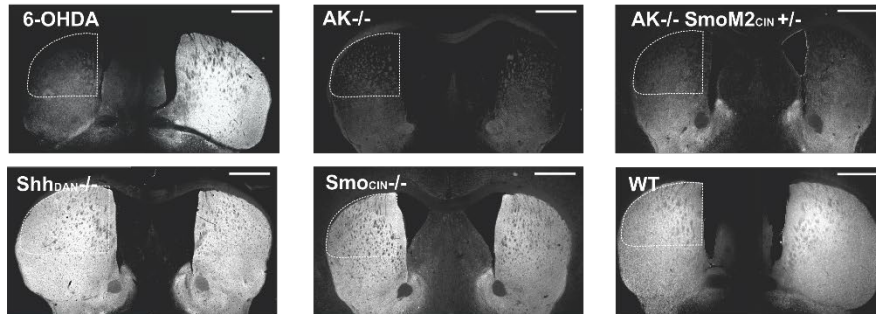

### b TH fiber density % Change

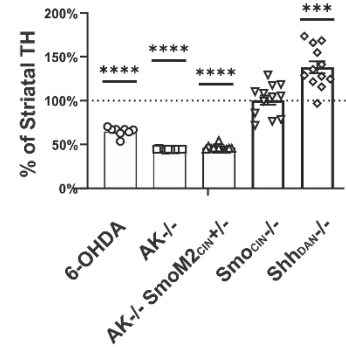

### c DAN Soma in the Mesencephalon

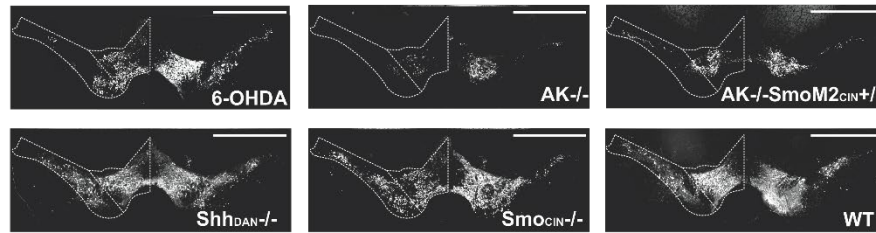

### d DAN Soma % Change

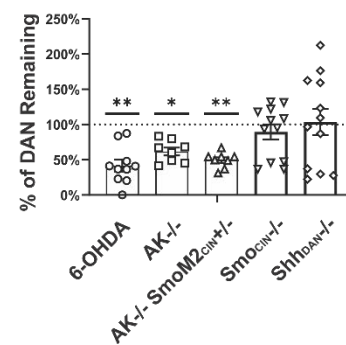

## Supplementary Figure 1: TH fiber density or numbers of midbrain DAN do not predict LID formation and expression.

**a** Tyrosine hydroxylase (TH) fiber density in the dorsolateral striatum (DLS, dotted quarter circle) was visualized as a proxy for the integrity of dopaminergic projections across the mouse models utilized in this study (Size bar: 500  $\mu$ m). **b** For quantification of Striatal TH fiber density, TH staining intensity was normalized to background signal and average TH intensity in the DLS per animal was reported. Results are reported as percent difference between experimental animals and average TH intensity of control animals ( $n = 8-12$ , 3-5 planes each; unpaired two-tailed student's t test \*\*\*\*  $P < 0.0001$  6-OHDA lesioned hemisphere vs. 6-OHDA unlesioned hemisphere,  $AK^{-/-}$  vs  $WT$ ,  $AK^{-/-} SmoM2CIN^{+/-}$  vs  $WT$ ,  $SmoCIN^{-/-}$  vs  $SmoCIN^{+/-}$ ; \*\*\*  $P < 0.001$   $Shh_{DAN}^{-/-}$  vs  $Shh_{DAN}^{+/-}$ ). All bar graphs are plotted as mean  $\pm$  SEM. **c** DAN cell bodies were identified as TH positive cell soma on coronal sections of the mesencephalon in all mouse models used in this study (Size bar: 500  $\mu$ m). **d** For quantification of Midbrain DAN Soma, TH background signal was set as a threshold and all soma in the VTA and SNpc with TH signal above background were counted. Results are reported as percent difference in number of TH+ soma between experimental animals and control animals ( $n = 8-12$ , 3-5 planes each; unpaired two-tailed student's t test \*\*  $P < 0.01$  6-OHDA lesioned hemisphere vs. 6-OHDA unlesioned hemisphere,  $AK^{-/-} SmoM2CIN^{+/-}$  vs  $WT$ , \*  $P < 0.05$   $AK^{-/-}$  vs  $WT$ ). All bar graphs are plotted as mean  $\pm$  SEM.

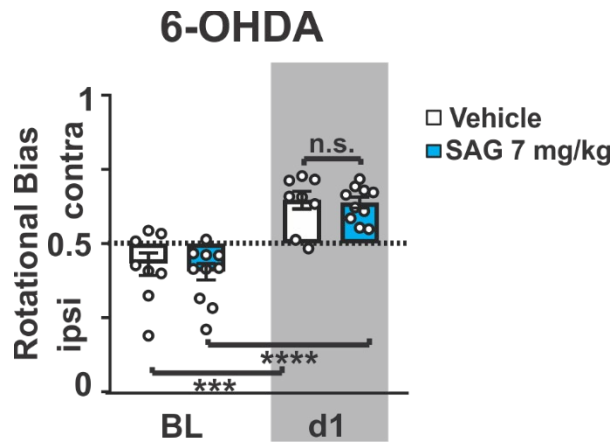

**Supplementary Figure 2: Functional validation of the unilateral 6-OHDA lesion model.**

Quantification of rotational bias as a ratio of contra- to ipsilateral turns. Dotted line signifies the absence of turning bias. Mice with 6-OHDA lesions (baseline: BL, white bar) turned ipsilateral to the lesion, indicative of hypodopaminergia in the lesioned hemisphere. Upon L-Dopa (5 mg/kg) dosing, mice turned contralateral towards the lesion, suggesting dopamine hypersensitivity had formed in the lesioned hemisphere (d1, white bar). Co-injection of L-Dopa with Smo agonist SAG (7 mg/kg, blue bars) did not alter turning bias caused by L-Dopa alone. ( $n = 8-9$ ; RM two-way ANOVA time effect:  $F_{(2,50)} = 20.19$ ,  $P < 0.0001$ . Post hoc Bonferroni's test: \*\*\*  $P < 0.001$  BL vs. day 1). Bar graphs are plotted as mean  $\pm$  SEM.

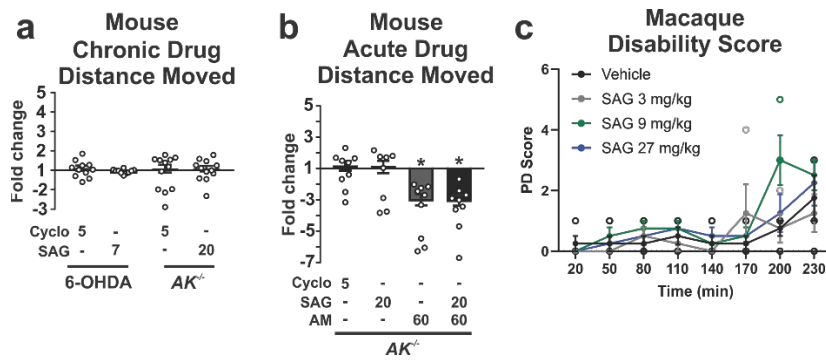

### Supplementary Figure 3: SAG treatment does not curtail the anti-parkinsonian benefit of L-Dopa

**a** Fold change of distance moved in an open field arena following daily co-injection of L-Dopa and either Cyclopamine (5 mg/kg) or SAG (7 mg/kg for 6-OHDA mice or 20 mg/kg in *AK<sup>-/-</sup>* mice) in 6-OHDA (day 14 of treatment; n = 8) and *AK<sup>-/-</sup>* (day 26 of treatment; n = 12) mice. Results are reported as fold change over vehicle-treated controls. Cyclopamine or SAG co-injection with L-Dopa in 6-OHDA treated or *AK<sup>-/-</sup>* mice did not alter locomotion activity compared to L-Dopa + vehicle controls. **b** Fold change of distance moved on day 20 of daily L-Dopa injections *AK<sup>-/-</sup>* mice that received an acute dose of either Cyclopamine (5 mg/kg; n = 9), SAG (20 mg/kg; n = 8), Amantadine (AM, 60 mg/kg; n=9), or a combination of AM (60 mg/kg) and SAG (20 mg/kg; n = 8). AM significantly reduced the anti-akinetic benefit of L-Dopa but SAG did not (unpaired two-tailed student's t test: \* P<0.05 for treatment vs. vehicle. n.s. indicates P>0.05). **c** Parkinsonian disability score of Parkinsonian Macaques across a four-hour time course after receiving L-Dopa together with either vehicle or SAG (3, 9, and 27 mg/kg; n = 4 per condition). Scoring involved evaluating a range of movements including bradykinesia, postural abnormality, and tremor, yielding a maximum global parkinsonian disability score of 10 (Methods). There was no effect of SAG on the Parkinsonian disability score signifying that SAG did not diminish the akinetic benefit of L-Dopa treatment. All graphs are plotted as mean +/- SEM.

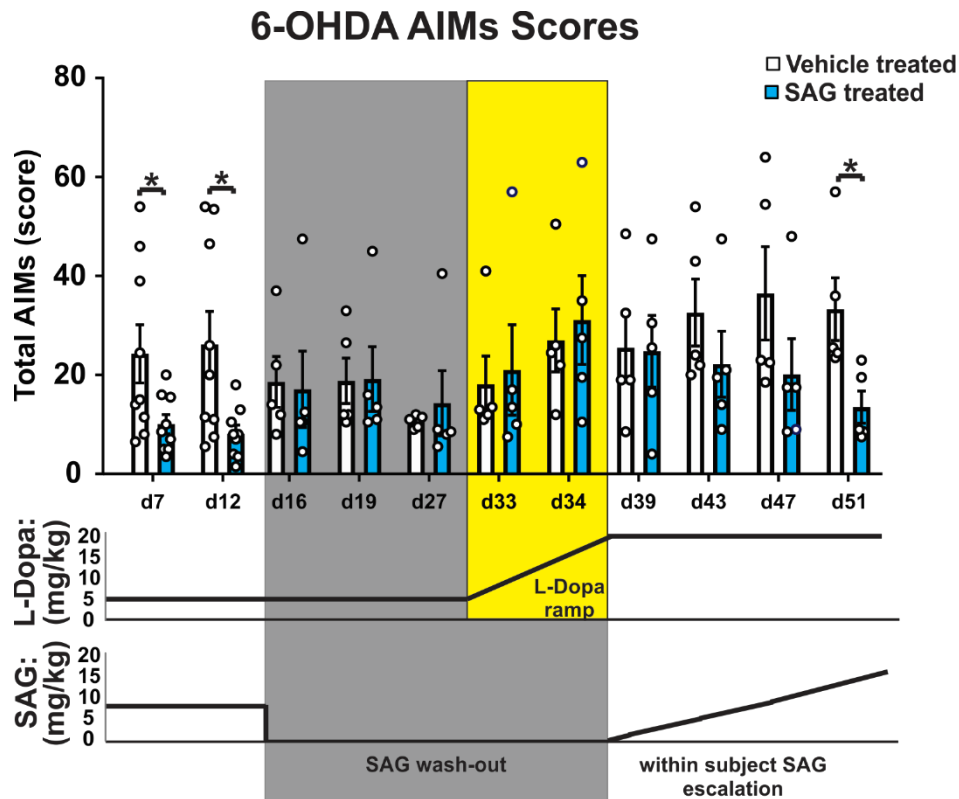

**Supplementary Figure 4: AIMs can be repeatedly attenuated or reinstated through sequential dosing of L-Dopa with or without SAG, respectively.**

6-OHDA animals co-injected daily with L-Dopa and Smo agonist SAG (5 mg/kg) for seven days showed significantly attenuated LID compared to L-Dopa only injected controls. Additional days of L-Dopa and SAG co-administration did not further reduce LID (d12). Terminating SAG dosing on day 16 while continuing L-Dopa treatment resulted in an immediate reappearance of LID to levels seen in controls. Severity of reinstated LID remained sensitive to L-Dopa concentration such that a gradual increase in L-Dopa dosing led to greater AIM scores with no difference in kinetics or absolute intensity compared to controls (d33–d34). Reinstated LID could be attenuated again in a dose-dependent manner through within-subject escalation of SAG on days 39–51. During this within-subject SAG escalation, three-day SAG washout periods during which only L-Dopa was administered were included between days of increasing SAG dose administration (n = 9 for d 7, 12; n = 5 for d 16–51; Paired two-tailed student's t test: \* P<0.05 treatment vs. vehicle. n.s. indicates P > 0.05). Bar graph is plotted as mean +/- SEM.

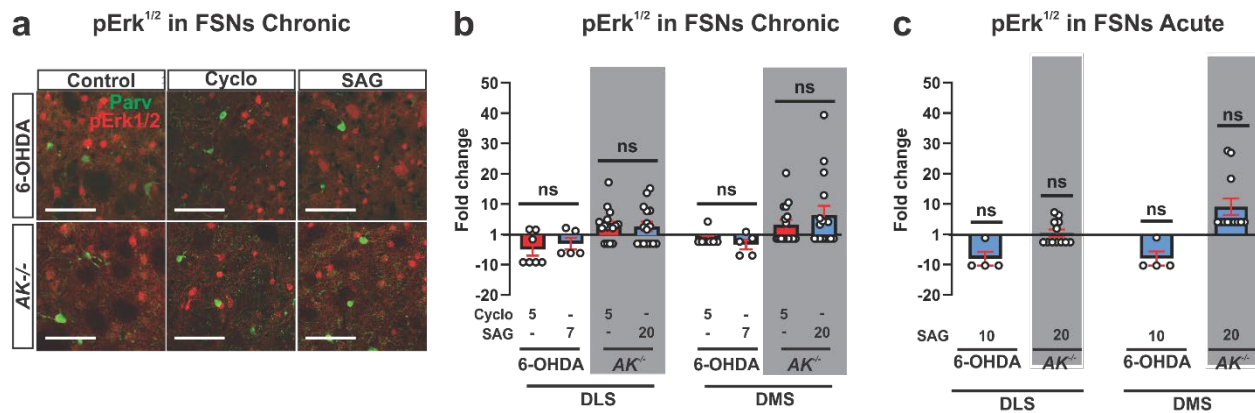

### Supplementary Figure 5: Smo activity does not modulate the MAP Kinase pathway in FSN

**a** Representative images from DLS of 6-OHDA or *AK<sup>-/-</sup>* mice revealing no evidence for co-localization of the cytohistological LID marker pErk<sup>1/2</sup> (red) with the FSN marker Parvalbumin (Parv, green) after repeated co-administration of L-Dopa (5 mg/kg for 6-OHDA or 25 mg/kg for *AK<sup>-/-</sup>* animals) with vehicle (control), cyclo (5 mg/kg), or SAG (7 mg/kg for 6-OHDA mice or 20 mg/kg for *AK<sup>-/-</sup>* mice). Images were taken from DLS of animals whose AIMs were quantified in panels **b** and **c** of Figure 1. (Scale bar = 50  $\mu$ m). **b** Quantification of the prevalence of pErk<sup>1/2</sup>-positive FSNs shown in (Figure 1g) expressed as fold change over vehicle in the DLS and DMS. Cycloamine or SAG treatment did not alter pErk<sup>1/2</sup> prevalence in the DLS or DMS (n= 7-15 per condition; 3 sections each; ~36 CIN per section, post-mortem analysis of animals quantified in Figure 1 **b** and **c**; unpaired two-tailed student's t test: \* P<0.05 treatment vs. vehicle. n.s. indicates P>0.05). **c** Quantification of the prevalence of pErk<sup>1/2</sup>-positive CIN in L-Dopa treated 6-OHDA (5 mg/kg L-Dopa for 14 days) or *AK<sup>-/-</sup>* (25 mg/kg L-Dopa for 20 days) animals given a single dose SAG (10 mg/kg for 6-OHDA animals, 20 mg/kg for *AK<sup>-/-</sup>* animals). Smo agonist treatment did not significantly alter the prevalence of pErk<sup>1/2</sup>-positive FSN in the DLS or DMS (n= 5-13 per condition; 3 sections each; ~36 CIN per section, post-mortem analysis of animals whose AIMs were quantified in Figure 1 **d** and **e**; unpaired two-tailed student's t test: \* P<0.01, \*\*\* P<0.001, for treatment vs. vehicle. n.s. indicates P>0.05). All bar graphs are plotted as mean +/- SEM.

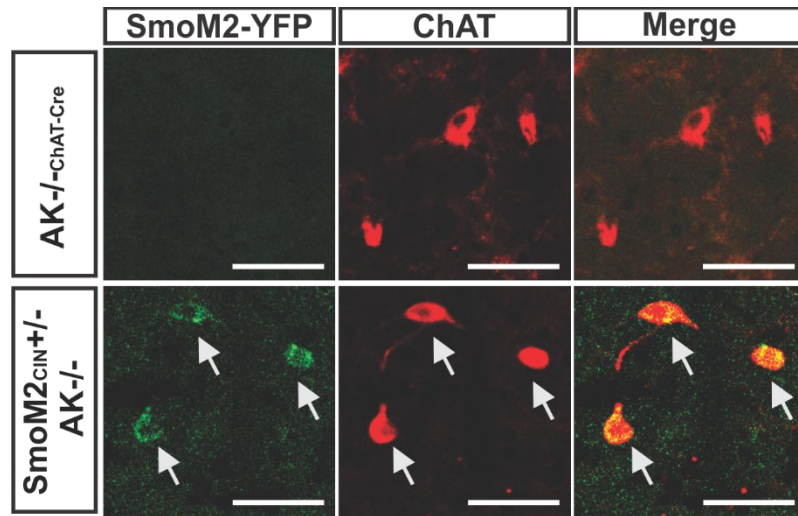

**Supplementary Figure 6: Conditional expression of SmoM2 in CIN of  $AK^{-/-}$  mice.**

Images of the DLS showing eYFP-tagged SmoM2 expression selectively in CIN of  $SmoM2_{CIN}^{+/-}AK^{-/-}$  (arrows) but not in  $AK^{-/-}ChAT-Cre$  littermate controls. CIN identified through co-labeling with ChAT. (Scale bar = 50  $\mu$ m).

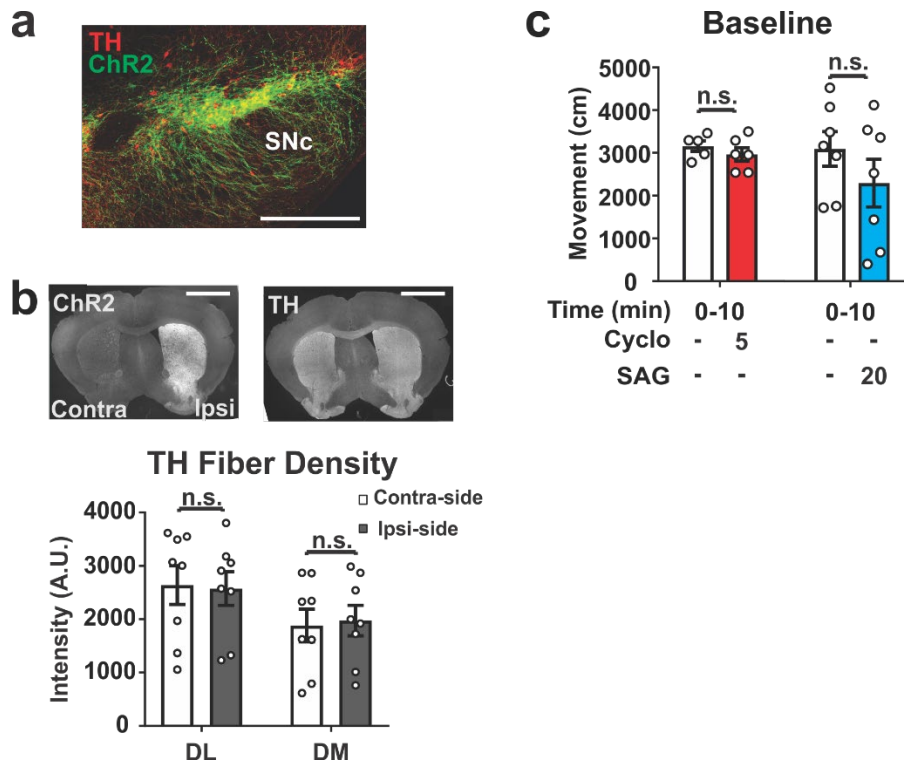

**Supplementary Figure 7: Daily repeated, long-term optogenetic stimulation of DAN does not reduce dopaminergic fiber density in the striatum.**

**a** Co-localization of the channelrhodopsin (ChR2)::eYFP (green) fusion protein and TH (red) in the SNpc of *Dat-Cre<sup>+/-</sup>* animals (scale bar = 500  $\mu$ m). **b** Representative images and quantification of TH fiber density after daily, hour long optical burst stimulation of DAN for 10 days. Comparison is made between the hemisphere ipsilateral to ChR2 expression and the contralateral striatum ( $n = 8$ ; n.s. indicates  $P > 0.05$ ; scale bar = 1 mm). **c** Neither Cyclopamine (5 mg/kg) nor SAG 20 (mg/kg) injection altered total locomotion displacement in the Open Field paradigm. All bar graphs are plotted as mean  $\pm$  SEM.



## Supplementary Tables:

**Supplementary Table 1: Summary of dosing regiments and cyto-histochemical analysis for each paradigm.**

| Paradigm                            | L-Dopa [mg/kg]    | Cyclopamine [mg/kg] | SAG [mg/kg]           | Purmorphamine [mg/kg] | pERK <sub>CIN</sub> levels | p-rpS6 <sub>CIN</sub> levels |
|-------------------------------------|-------------------|---------------------|-----------------------|-----------------------|----------------------------|------------------------------|
| 6-OHDA                              | 5 or 5; 10; 15;20 | 5                   | 0.8; 2.5; 7           | 15                    | yes                        | n/d                          |
| AK <sup>-/-</sup>                   | 25 or 5; 10; 30   | 5                   | 20 or 0.8; 2.5; 7; 15 | n/d                   | yes                        | n/d                          |
| Macaques                            | 18 - 22           | n/d                 | 3; 9; 27              | n/d                   | n/d                        | n/d                          |
| Shh <sub>DAN</sub> <sup>-/-</sup>   | 10 or 25          | n/d                 | 10 or 20              | n/d                   | yes                        | yes                          |
| Smo <sub>CIN</sub> <sup>-/-</sup>   | 25                | n/d                 | n/a                   | n/d                   | yes                        | yes                          |
| SmoM2 <sub>CIN</sub> <sup>+/-</sup> | 25                | n/d                 | n/a                   | n/d                   | yes                        | yes                          |
| Optogenetic DAN activation          | n/a               | 5                   | 20                    | n/d                   | n/d                        | yes                          |

**Supplementary Table 2: Summary of genotypes of experimental and control animals of all recombinant mouse lines and their ages at time of analysis.**

| Paradigm                                                                                                           | Genotype experimental                                                                          | Genotype control                             | Age dosing | Age LID analysis | Age Erk analysis | Age TH fiber/DAN analysis |
|--------------------------------------------------------------------------------------------------------------------|------------------------------------------------------------------------------------------------|----------------------------------------------|------------|------------------|------------------|---------------------------|
| <i>Shh</i> <sub>DAN</sub> <sup>-/-</sup> vs. <i>Shh</i> <sub>DAN</sub> <sup>+/-</sup>                              | Shh-nLacZ <sup>L/L</sup> ; Dat-Cre                                                             | Shh-nLacZ <sup>L/+</sup> ; Dat-Cre           | 2-3        | 3                | 3                | 3;<br>1 – 18 [1]          |
| <i>Smo</i> <sub>CIN</sub> <sup>-/-</sup> vs. <i>Smo</i> <sub>CIN</sub> <sup>+/-</sup>                              | <i>Smo</i> <sup>L/L</sup> ; ChAT-IRES-Cre                                                      | <i>Smo</i> <sup>L/+</sup> ; ChAT-IRES-Cre    | 2-3        | 3                | 3                | 3                         |
| <i>Smo</i> <i>M2</i> <sub>CIN</sub> <sup>+/-</sup> ; <i>AK</i> <sup>-/-</sup> vs. <i>ChatCre AK</i> <sup>-/-</sup> | <sup>L</sup> STOP <sup>L</sup> <i>SmoM2</i> -YFP; ChAT-IRES-Cre; <i>Pitx3</i> <sup>ak/ak</sup> | ChAT-IRES-Cre; <i>Pitx3</i> <sup>ak/ak</sup> | 2-3        | 3                | 3                | 3                         |

**Supplementary Table 3: Strain specific genotyping PCR amplimers.**

| <b>Gene</b>          | <b>Oligo Forward</b>       | <b>Oligo Reverse</b>       |
|----------------------|----------------------------|----------------------------|
| Shh                  | GTAAGAGCACATTACCCAGAGAACTG | CCTGTTGTTACTGGATCCCTTCCATC |
| Generic Cre          | TAGCGCCGTAAATCAATCG        | AATGCTTCTGTCCGTTTGC        |
| Smo <sup>fl/fl</sup> | ATGGCCGCTGGCCGCCCGTG       | GGCGCTACCGGTGGATGTGG       |
| Smo WT               | CCACTGCGAGCCTTTGCGCTAC     | CCCATCACCTCCGCGTCGCA       |
| SmoM2<br>Mutant      | CTGACCCTGAAGTTCATCTGC      | GTGCGCTCCTGGACGTAG         |
| SmoM2 WT             | CGTGATCTGCAACTCCAGTC       | GGAGCGGGAGAAATGGATATG      |
| ChAT-Cre             | CAGGGTTAGTAGGGGCTGAC       | CAAAAGCGCTCTGAAGTTCCT      |

**Supplementary Table 4: Reagents and Resources:**

| Reagent or Resource                                  | Source                                      | Identifier                    |
|------------------------------------------------------|---------------------------------------------|-------------------------------|
| <b>Antibodies</b>                                    |                                             |                               |
| Rabbit anti-TH                                       | Millipore                                   | 657012                        |
| Chicken anti-B Galactosidase                         | Millipore                                   | AB986                         |
| Goat anti-chat                                       | Millipore                                   | AB144P                        |
| Goat anti-parv                                       | Swant                                       | PVG-213                       |
| Rabbit anti-p-p44/42 MAPK (Erk1/2)                   | Cell Signaling Technology                   | 9101                          |
|                                                      |                                             |                               |
| Rabbit anti-cfosB                                    | Cell Signaling Technology                   | 2250                          |
| Rabbit anti-p-(Ser/Thr)PKA substrate                 | Cell Signaling Technology                   | 9621                          |
| GP anti-vGlut1                                       | Dr. Thomas Jessell from Columbia Laboratory |                               |
| GP anti-vGlut2                                       | Millipore                                   | AB2251-1                      |
| Rabbit anti-PSD95                                    | Invitrogen                                  | 51-6900                       |
| Rabbit anti-p-rpS6                                   | Cell Signaling Technology                   | 5364                          |
| Mouse anti-NeuN                                      | Chemicon international                      | MAB377                        |
| Alexa Fluor 488- Donkey Anti-Goat IgG                | Jackson ImmunoResearch                      | 705-545-147                   |
| Alexa Fluor Cy3- Donkey Anti-Goat IgG                | Jackson ImmunoResearch                      | 705-165-147                   |
| Alexa Fluor Cy3- Donkey Anti-Rabbit IgG              | Jackson ImmunoResearch                      | 711-165-152                   |
| Alexa Fluor 594- Donkey Anti-Rabbit IgG              | Jackson ImmunoResearch                      | 711-585-152                   |
| Alexa Fluor Cy5- Donkey Anti-Mouse IgG               | Jackson ImmunoResearch                      | 715-175-150                   |
| Alexa Fluor Cy5- Donkey Anti-GP IgG                  | Jackson ImmunoResearch                      | 706-175-148                   |
| Alexa Fluor Cy5- Donkey Anti-Chicken IgG             | Jackson ImmunoResearch                      | 703-175-155                   |
| <b>Virus Strains</b>                                 |                                             |                               |
| AAV5-EF1 $\alpha$ -DIO-eYFP                          | University of North Carolina Vector Core    |                               |
| <b>Chemicals, Peptides, and Recombinant Proteins</b> |                                             |                               |
| 6-Hydroxydopamine hydrobromide                       | Sigma-Aldrich                               | H4381                         |
| Smoothened Agonist (SAG)                             | Carbosynth Limited                          | FS27779                       |
| SAG-HCl                                              | Carbosynth Limited                          | FS76762                       |
| Cyclopamine                                          | Carbosynth Limited                          | FC20718                       |
| VECTASHIELD Antifade Mounting Medium                 | Vector Laboratories                         | Cat# H-1000, RRID: AB_2336789 |
| Neg-50                                               | Thermo Scientific                           | 6506M                         |
| C&B-Metabond                                         | Parkell                                     | S380                          |
| Benserazide hydrochloride                            | Sigma-Aldrich                               | B7283                         |

|                                                                                                                |                                                  |                                                                                                                                                                              |
|----------------------------------------------------------------------------------------------------------------|--------------------------------------------------|------------------------------------------------------------------------------------------------------------------------------------------------------------------------------|
| L-3,4-Dihydroxyphenylalanine methyl ester hydrochloride                                                        | Sigma-Aldrich                                    | D1507                                                                                                                                                                        |
| Hydroxypropyl- $\beta$ -cyclodextrin (HPCD)                                                                    | Sigma-Aldrich                                    | H107                                                                                                                                                                         |
| Amantadine hydrochloride                                                                                       | Sigma-Aldrich                                    | A1260                                                                                                                                                                        |
| Ascorbic acid                                                                                                  | Sigma-Aldrich                                    | A92902                                                                                                                                                                       |
| Bupivacaine (Murcaine)                                                                                         | Sigma-Aldrich                                    | B5274                                                                                                                                                                        |
| M4PAM (VU0467154)                                                                                              | StressMarq Biosciences                           | SIH-184                                                                                                                                                                      |
| Purmorphamine                                                                                                  | ABCam                                            | Ab120933                                                                                                                                                                     |
| <b>Experimental Models: Organisms/Strains</b>                                                                  |                                                  |                                                                                                                                                                              |
| Mouse: WT: C57BL/6J                                                                                            | The Jackson Laboratory                           | RRID: IMSR_JAX:000664                                                                                                                                                        |
| Mouse: Shh-nLZ <sup>C/C</sup>                                                                                  | The Jackson Laboratory                           | Gonzalez-Reyes et al., 2012RRID: IMSR_JAX:000664                                                                                                                             |
| Mouse: Shh-nLZ <sup>C/C</sup> /Dat-Cre Slc6a3tm1(cre)Xz/JMouse: Shh-nLZ <sup>C/C</sup>                         | The Jackson Laboratory                           | Stock No: 020080                                                                                                                                                             |
| Mouse: myrGFP; Shh-cre                                                                                         | The Jackson Laboratory                           |                                                                                                                                                                              |
| Mouse: Pitx3ak/ak                                                                                              | Dr. Un Jung Kang from Columbia University        |                                                                                                                                                                              |
| Non-human primates: <i>Macaca Fascularis</i>                                                                   | Xierxin, Beijing, PR of China                    |                                                                                                                                                                              |
| <b>Software and Algorithms</b>                                                                                 |                                                  |                                                                                                                                                                              |
| ImageJ                                                                                                         | NIH                                              | <a href="https://imagej.nih.gov/ij/">https://imagej.nih.gov/ij/</a> ; RRID: SCR_003070                                                                                       |
| EthoVision 10 XT                                                                                               | Noldus                                           | <a href="http://www.noldus.com/animal-behavior-research/products/ethovision-xt">http://www.noldus.com/animal-behavior-research/products/ethovision-xt</a> ; RRID: SCR_000441 |
| Statistica10                                                                                                   | Statsoft                                         |                                                                                                                                                                              |
| Prism 7                                                                                                        | Graphpad                                         |                                                                                                                                                                              |
| <b>Other</b>                                                                                                   |                                                  |                                                                                                                                                                              |
| Micro-syringe pump                                                                                             | World Precision Instruments                      |                                                                                                                                                                              |
| LRS-0473-GFM-00050-05 LabSpec 473nm DPSS Laser System Output: >50mW                                            | Laserglow Technologies                           | R470505GX                                                                                                                                                                    |
| LSG-532-NF-7 Fit-Over Safety Goggles 532nm LRS-0473-GFM-00050-05 LabSpec 473nm DPSS Laser System Output: >50mW | Laserglow Technologies<br>Laserglow Technologies | AGF5327XXR470505GX                                                                                                                                                           |
| FC/PC Fiber Coupler/Collimator LSG-532-NF-7 Fit-Over Safety Goggles 532nm                                      | Laserglow Technologies<br>Laserglow Technologies | ACFVISHXXAGF5327XX                                                                                                                                                           |

|                                                                                                                                            |                                          |                                |
|--------------------------------------------------------------------------------------------------------------------------------------------|------------------------------------------|--------------------------------|
| Optogenetics TTL Pulse Generator - 4 channels<br>FC/PC Fiber Coupler/Collimator                                                            | Doric Lenses Inc. Laserglow Technologies | OTPG_4ACFVISHXX                |
| 1x2 Fiber-optic Rotary Joints<br>Optogenetics TTL Pulse Generator - 4 channels                                                             | Doric Lenses Inc. Doric Lenses Inc.      | FRJ_1x2i_FC-2FC_0.22<br>OTPG_4 |
| Power Meter, Si Sensor, 400 - 1100 nm, 50 nW - 50mW<br>1x2 Fiber-optic Rotary Joints                                                       | Thorlabs Doric Lenses Inc.               | PM120DFRJ_1x2i_FC-2FC_0.22     |
| 0.39 NA, Ø200 µm Core Multimode Optical Fiber, High OH for 300 - 1200 nm, TECS Clad<br>Power Meter, Si Sensor, 400 - 1100 nm, 50 nW - 50mW | Thorlabs                                 | FT200UMTPM120D                 |
| Ceramic LC MM Ferrule, ID 230µm - 10 pack<br>0.39 NA, Ø200 µm Core Multimode Optical Fiber, High OH for 300 - 1200 nm, TECS Clad           | Thorlabs                                 | CFLC230-10FT200UMT             |
| Fiber Inspection Scope 200x, with FC and SMA Adapters<br>Ceramic LC MM Ferrule, ID 230µm - 10 pack                                         | Thorlabs                                 | FS201CFLC230-10                |
| LC Adapter for FS200 Series Fiber Inspection Scope<br>Fiber Inspection Scope 200x, with FC and SMA Adapters                                | Thorlabs                                 | FS200-LCFS201                  |
| White Dust Caps for Ø1.25 mm Ferrules 25pack<br>LC Adapter for FS200 Series Fiber Inspection Scope                                         | Thorlabs                                 | CAPLFS200-LC                   |
| Fiber Stripping Tool<br>White Dust Caps for Ø1.25 mm Ferrules 25pack                                                                       | Thorlabs                                 | T12S21CAPL                     |
| Rubber Gripper for Bare Fiber<br>Fiber Stripping Tool                                                                                      | Thorlabs                                 | BFG1<br>T12S21                 |
| Crimp Tool<br>Rubber Gripper for Bare Fiber                                                                                                | Thorlabs                                 | CT042BFG1                      |
| Ruby Fiber Scribe<br>Crimp Tool                                                                                                            | Thorlabs                                 | S90RCT042                      |
| FC/PC and SC/PC Connector Polishing Disc<br>Ruby Fiber Scribe                                                                              | Thorlabs                                 | D50-FCS90R                     |
| LC/PC Connector Polishing Disc<br>FC/PC and SC/PC Connector Polishing Disc                                                                 | Thorlabs                                 | D50-LCD50-FC                   |
| 6" x 6" Final Lapping (Polishing) Sheets, 0.02 µm                                                                                          | Thorlabs                                 | LFCFD50-LC                     |

|                                                                                                                                   |          |                   |
|-----------------------------------------------------------------------------------------------------------------------------------|----------|-------------------|
| Grit (5 Sheets)LC/PC Connector Polishing Disc                                                                                     |          |                   |
| 6" x 6" Diamond Lapping (Polishing) Sheets, 1 µm Grit (5 Sheets)6" x 6" Final Lapping (Polishing) Sheets, 0.02 µm Grit (5 Sheets) | Thorlabs | LF1DLFCF          |
| 6" x 6" Diamond Lapping (Polishing) Sheets, 3 µm Grit (5 Sheets)6" x 6" Diamond Lapping (Polishing) Sheets, 1 µm Grit (5 Sheets)  | Thorlabs | LF3DLF1D          |
| 6" x 6" Diamond Lapping (Polishing) Sheets, 6 µm Grit (5 Sheets)6" x 6" Diamond Lapping (Polishing) Sheets, 3 µm Grit (5 Sheets)  | Thorlabs | LF6DLF3D          |
| 6" x 6" Diamond Lapping (Polishing) Sheets, 30 µm Grit (5 Sheets)6" x 6" Diamond Lapping (Polishing) Sheets, 6 µm Grit (5 Sheets) | Thorlabs | LF30DLF6D         |
| LOCTITE® EPOXY INSTANT MIX™ 5 MINUTE6" x 6" Diamond Lapping (Polishing) Sheets, 30 µm Grit (5 Sheets)                             | Thorlabs | LF30D             |
| Glass Polishing Plate, 9.5" x 13.5"LOCTITE® EPOXY INSTANT MIX™ 5 MINUTE                                                           | Thorlabs | CTG913            |
| Polishing Pad for PC Finishes, 8.75" x 13", 50 DurometerGlass Polishing Plate, 9.5" x 13.5"                                       | Thorlabs | NRS913A<br>CTG913 |
| Crimp ToolPolishing Pad for PC Finishes, 8.75" x 13", 50 Durometer                                                                | Thorlabs | CT042NRS913A      |
| FC/PC Multimode Connector, Ø240 µm Bore, Ceramic FerruleCrimp Tool                                                                | Thorlabs | 30240C1CT042      |
| FC/PC Multimode Connector, Ø240 µm Bore, Ceramic Ferrule                                                                          | Thorlabs | 30240C1           |

### Supplementary References:

1. Gonzalez-Reyes, L.E., et al., *Sonic hedgehog maintains cellular and neurochemical homeostasis in the adult nigrostriatal circuit*. Neuron, 2012. **75**(2): p. 306-19.
