# Supplementary material for: Dopaminergic co-transmission with sonic hedgehog inhibits abnormal involuntary movements in models of Parkinson’s disease and L-Dopa induced dyskinesia
Source: PubMed Central journal article supplement (PMC8458306; doi:10.1038/s42003-021-02567-3), 2021-09-22
Supplement: 42003_2021_2567_MOESM3_ESM.pdf [file 42003_2021_2567_MOESM3_ESM.pdf]

## **Description of Additional Supplementary Files**

**File name:** Supplementary Movie 1

**Description:** OID AIMs day 1.

**File name:** Supplementary Movie 2

**Description:** OID AIMs day 10.

**File name:** Supplementary Movie 3

**Description:** OID AIMs after SAG day 11.

**File name:** Supplementary Data 1.

**Description:** Source data.
